# Supplementary material
Source: MDPI journal article supplement (https://www.mdpi.com/2072-4292/12/14/2188)
Supplement: s1 [file s1]

## Supplementary Material

### 1. Data set

Table S1: Pleiades images: Bands, wavelengths, and spatial resolution

| Bandes       | Wavelengths (nm) | Resolution (meters) |
|--------------|------------------|---------------------|
| Blue         | 430-550 nm       | 0.7 m               |
| Green        | 490-610 nm       | 0.7 m               |
| Red          | 600-720 nm       | 0.7 m               |
| NIR          | 750-950 nm       | 0.7 m               |
| Panchromatic | 480-830 nm       | 0.5 m               |

Table S2: Sentinel-2 images: Bands, wavelengths, and spatial resolution

| Band                          | B1  | B2  | B3  | B4  | B5  | B6  | B7  | B8  | B8a | B9  | B10  | B11  | B12  |
|-------------------------------|-----|-----|-----|-----|-----|-----|-----|-----|-----|-----|------|------|------|
| Center $\lambda$<br>(nm)      | 443 | 490 | 560 | 665 | 705 | 740 | 783 | 842 | 865 | 945 | 1375 | 1610 | 2190 |
| Width $\lambda$<br>(nm)       | 20  | 65  | 35  | 30  | 15  | 15  | 20  | 115 | 20  | 20  | 30   | 90   | 180  |
| Spatial<br>resoluti<br>on (m) | 60  | 10  | 10  | 10  | 20  | 20  | 20  | 10  | 20  | 60  | 60   | 20   | 20   |

### 2. Methodology

Table S3 : Different indices used for classifications

| Indice                                                              | Formule                                                            | Characteristics / Definitions                                                                                                                                                         | Source                       |
|---------------------------------------------------------------------|--------------------------------------------------------------------|---------------------------------------------------------------------------------------------------------------------------------------------------------------------------------------|------------------------------|
| <b>EVI</b> (Enhanced Vegetation Index)                              | $2.5 * (NIR - Red) / (NIR + 6 * Red - 7.5 * Blue) + 1$             | <b>EVI</b> quantifies vegetation greenness. Vegetation index, more suitable than NDVI for areas with high biomass                                                                     | Huete et al. (2002), [1].    |
| <b>MCARI</b> (Modified Chlorophyll Absorption in Reflectance Index) | $((RedEdge1 - Red) - 0.2 * (RedEdge1 - Green)) * (RedEdge1 - Red)$ | <b>MCARI</b> gives a measure of the depth of chlorophyll absorption and is very sensitive to variations in chlorophyll concentrations as well as variations in Leaf Area Index (LAI). | Daughtry et al. (2000), [2]. |

|                                                             |                                           |                                                                                                                                                                                                                       |                              |
|-------------------------------------------------------------|-------------------------------------------|-----------------------------------------------------------------------------------------------------------------------------------------------------------------------------------------------------------------------|------------------------------|
| <b>NDPI</b> (Normalized Difference Pond Index)              | $(\text{MIR1-Green})/(\text{MIR1+Green})$ | <b>NDPI</b> when used in conjunction with NDVI, provides better discrimination of the aquatic and wetland vegetation from the normal vegetation compared to the NDVI, which detects all types of vegetation.          | Lacaux et al. (2007), [3].   |
| <b>NDTI</b> (Normalized Difference Turbidity Index)         | $(\text{Red-Green})/(\text{Red+Green})$   | The <b>NDTI</b> allows the detection of high turbidity (low clarity) water cover.                                                                                                                                     | Lacaux et al. (2007), [3].   |
| <b>NDVI</b> (Normalized Difference Vegetation Index)        | $(\text{NIR-Red})/(\text{NIR+Red})$       | <b>Normalized difference</b> between the near infrared (NIR) and visible red reflectance, corresponding respectively to the strong chlorophyll absorption region and high reflectance plateau of vegetation canopies. | Tucker (1979), [4].          |
| <b>NDWI (Gao)</b> (Normalized Difference Water Index)       | $(\text{NIR-MIR1})/(\text{NIR+MIR1})$     | <b>NDWI 1</b> is sensitive to water content in leaves (so to water stress).                                                                                                                                           | Gao (1996), [5].             |
| <b>NDWI (McFeeters)</b> (Normalized Difference Water Index) | $(\text{Green-NIR})/(\text{Green+NIR})$   | <b>NDWI 2</b> is used to delineate open water features.                                                                                                                                                               | Mc Feeters (1996), [6].      |
| <b>PSSR</b> (Pigment Specific Simple Ratio)                 | NIR/Red                                   | <b>PSSR</b> is more sensitive to chlorophyll-a concentration than the NDVI and specifically useful for differentiation in stressed and senescent vegetation.                                                          | Gitelson et al. (1996), [7]. |

## References

- Huete, A.; Didan, K.; Miura, T.; Rodriguez, E.P.; Gao, X.; Ferreira, L.G. Overview of the radiometric and biophysical performance of the MODIS vegetation indices. The Moderate Resolution Imaging Spectroradiometer (MODIS): A new generation of Land Surface Monitoring. *Remote Sens. Environ.* **2002**, *83*, 195–213, doi:10.1016/S0034-4257(02)00096-2.
- Daughtry, C.S.T.; Walthall, C.L.; Kim, M.S.; De Colstoun, E.B.; McMurtreyIII, J.E. Estimating Corn Leaf Chlorophyll Concentration from Leaf and Canopy Reflectance. *Remote Sens. Environ.* **2000**, *74*, 229–239.
- Lacaux, J.P.; Tourre, Y.M.; Vignolles, C.; Ndione, J.A.; Lafaye, M. Classification of ponds from high-spatial resolution remote sensing: Application to Rift Valley Fever epidemics in Senegal. *Remote Sens. Environ.* **2007**, doi:10.1016/j.rse.2006.07.012.
- Tucker, C.J. Red and photographic infrared linear combinations for monitoring vegetation. *Remote Sens. Environ.* **1979**, *18*, 2691–2697.
- Gao, B.C. NDWI—A normalized difference water index for remote sensing of vegetation liquid water from space. *Remote Sens. Environ.* **1996**, *58*, 257–266.
- MacFeeters, S.K. The use of normalized water index (NDWI) in the delineation of open water features. *Int. J. Remote Sens.* **1996**, *17*, 1425–1432.
- Gitelson, A.A.; Kaufman, Y.J.; Merzlyak, M.N. Use of a green channel in remote sensing of global vegetation from EOS-MODIS. *Remote Sens. Environ.* **1996**, *58*, 289–298, doi:10.1016/S0034-4257(96)00072-7.
